September 27, 2020

## An evolutionary portrait of the progenitor SARS-CoV-2 and its dominant offshoots in COVID-19 pandemic

Sudhir Kumar<sup>1,2,\*</sup>, Qiqing Tao<sup>1,2</sup>, Steven Weaver<sup>1,2</sup>, Maxwell Sanderford<sup>1,2</sup>, Marcos A. Caraballo-Ortiz<sup>1,2</sup>, Sudip Sharma<sup>1,2</sup>, Sergei L. K. Pond<sup>1,2,\*</sup>, and Sayaka Miura<sup>1,2,\*</sup>

<sup>1</sup>Institute for Genomics and Evolutionary Medicine, Temple University, Philadelphia, PA.

<sup>2</sup>Department of Biology, Temple University, Philadelphia, PA.

**\*Co-corresponding author:**

Sudhir Kumar ([s.kumar@temple.edu](mailto:s.kumar@temple.edu))

Sergei Pond ([spond@temple.edu](mailto:spond@temple.edu))

Sayaka Miura ([sayaka.miura@temple.edu](mailto:sayaka.miura@temple.edu))

1   **Abstract:**

2   Severe acute respiratory syndrome coronavirus 2, SARS-CoV-2, was quickly identified as the cause of  
3   COVID-19 disease soon after its earliest reports. Global sequencing of thousands of genomes has revealed  
4   many common genetic variants, which are the key to unraveling the early evolutionary history of SARS-  
5   CoV-2 and tracking its global spread over time. However, our knowledge of fundamental events in the  
6   genome evolution and spread of this coronavirus remains grossly incomplete and highly uncertain. A deep  
7   understanding of the contemporary evolution of SARS-CoV-2 is urgently needed not only for a  
8   retrospective on how, when, and why COVID-19 has emerged and spread, but also for creating remedies  
9   through efforts of science, technology, medicine, and public policy. Here, we present the heretofore  
10   cryptic mutational history, phylogeny, and dynamics of SARS-CoV-2 from an analysis of tens of thousands  
11   of high-quality genomes. The reconstructed mutational progression is highly concordant with the timing  
12   of coronavirus sampling dates. It predicts the genome sequence of the progenitor virus whose earliest  
13   offspring, without any non-synonymous mutations, were still spreading worldwide months after the  
14   report of COVID-19. Over time, mutations of the progenitor gave rise to seven dominant lineages that  
15   spread episodically over time, some of which likely arose in Europe and North America after the genesis  
16   of the ancestral lineages in China. Mutational barcoding establishes that North American coronaviruses  
17   harbor genome signatures different from coronaviruses prevalent in Europe and Asia, which have  
18   converged over time. These spatiotemporal patterns continue to evolve as the pandemic progresses and  
19   can be viewed live online.

20 The early evolutionary history and order of mutational events that arose during the pandemic remain  
21 unresolved, even months after the initial detection of SARS-CoV-2 as the causal agent of COVID-19 and  
22 the acquisition of tens of thousands of genomes<sup>1-8</sup>. Widely-recognized impediments include a limited  
23 number of phylogenetically informative variants in genomes, the ubiquity of sequencing errors, and the  
24 lack of a closely-related outgroup sequence, all of which have complicated the inference and rooting of  
25 the SARS-CoV-2 phylogeny<sup>1-8</sup>. Consequently, the traditional approach to the analysis of viral spread and  
26 evolution in which a reliable genome phylogeny is first inferred, and then observed differences among  
27 sequences are mapped site-by-site, has not been able to stage the earliest mutational events in the  
28 evolution of the novel coronavirus<sup>9,10</sup>. The definition and cataloging of viral lineages are similarly  
29 complicated by phylogenetic noise<sup>7</sup>.

30 To circumvent these issues, we applied a mutation order approach (MOA) that does not rely on the  
31 inference of phylogeny as an intermediate step in reconstructing the mutational history of genomes<sup>11-</sup>  
32 <sup>13</sup>. MOA is well-suited for analyzing SARS-CoV-2 genomes because its clonal evolution, without evidence  
33 for recombination in the early stages of the outbreak, preserves the collinearity of variants in genomes.  
34 This feature enables effective use of shared co-occurrence of variants in genomes, as well as the  
35 frequencies of individual variants, to reliably infer mutational history, and then genome phylogeny,  
36 notwithstanding the presence of sequencing errors and other artifacts<sup>11,14</sup> (see *Methods*).

### 37 **A mutational history of SARS-CoV-2**

38 We analyzed 29,681 SARS-CoV-2 genomes (herewith referred to as 29KG dataset), each with at least  
39 28,000 bases, sampled between 24 December 2019 and 07 July 2020, representing 97 countries and  
40 regions around the world. In the 29KG dataset, 49 single nucleotide variants (SNVs) occur with greater  
41 than 1% variant frequency ( $vf > 1\%$ ; Extended Data Table 1). We used MOA to reconstruct the history  
42 of mutations that gave rise to these common variants, presented in figure 1. The first mutations ( $\mu$ 's,  
43  $\alpha$ 's, and  $\beta$ 's) were all sampled early on in Asia (China) and have the highest frequency in the 29KG  
44 dataset (Fig. 1, red pies). In this mutation history, over 95% of the variants showed an extremely high  
45 co-occurrence, i.e., each variant was found in the genomic background of the variant preceding it in  
46 the graph. The average co-occurrence index, COI, for all 49 variants exceeds 96.9%, indicating a strong  
47 signal to infer the mutation history reliably.

48 The inferred mutation order agreed with the timing of the first sampling for variants in all but two cases  
49 (Fig. 1, see *Methods*). This concordance provides independent validation of the reconstructed mutation  
50 graph because neither sampling dates nor locations were used in the inference of mutational history.  
51 Such independence is the key to avoiding circularity in the subsequent analysis of the origin and spread  
52 of new mutants. For example, some early genome samples in China have been used as references in  
53 databases and analyses to orient mutational changes<sup>15-18</sup>. This practice assumes that reference  
54 genomes are ancestral. The mutation history in figure 1, reconstructed independently of any  
55 spatiotemporal information, permits a direct test of this assumption (see below).

56 The progenitor SARS-CoV-2 genome. MOA predicts the genome sequence of the most recent common  
57 ancestor of all the genomes analyzed, i.e., the progenitor SARS-CoV-2 genome, henceforth proCoV2  
58 (available at <http://igem.temple.edu/COVID-19>). In the proCoV2 genome, there are 170 non-  
59 synonymous and 958 synonymous substitutions when compared with the genome of a closely-related  
60 coronavirus, RaTG13, found in a *Rhinolophus affinis* bat<sup>19</sup> (Fig. 2a). This amounts to a 96.12% sequence  
61 similarity between proCoV2 and RaTG13 sequences.

62 A comparison of the inferred proCoV2 sequence with genomes in the 29KG collection revealed no full  
63 matches at the nucleotide level. However, complete amino acid sequence encoded by 120 genomes  
64 were identical to that of proCoV2, i.e., these genomes contained only synonymous differences from  
65 proCoV2. A majority (80 genomes) of these matches were from coronaviruses sampled in China and  
66 other Asian countries. The first sequence was sampled 12 days after the earliest sampled virus whose  
67 genome became available on 24 December 2019, referred to as pandemic day 0 (week 0). Multiple  
68 matches were found in all sampled continents and detected as late as April 2020 (pandemic day 124)  
69 in Europe (Fig. 2c). These spatiotemporal patterns suggest that proCoV2 already possessed the  
70 repertoire of protein sequences needed to infect, spread, and persist in the global human population  
71 (see also ref.<sup>20</sup>).

72 Mutations of proCoV2 before the first COVID-19 reports. In the mutation history graph, the first three  
73 synonymous SNVs ( $\mu$ ) of proCoV2 are present individually in more than 98% of the genomes in the 29KG  
74 collection. They have almost reached fixation in the global coronavirus population (Fig. 3a). All three  
75 SNVs almost always co-occur and were present in all the genomes sequenced in China in December  
76 2019 (Fig. 1). The proCoV2 genome containing these three  $\mu$  variants gave rise to an evolutionary  
77 lineage characterized by three additional variants ( $\alpha$ ), all of which were found together in 90% of the  
78 genomes in 29KG and emerged before pandemic day 0. The first two  $\alpha$  mutations were synonymous,  
79 and the third one was a non-synonymous mutation in ORF8 (Fig. 2a; Extended Data Table 1). Out of a  
80 total of six initial mutations of proCoV2 ( $\mu$ 's and  $\alpha$ 's), the first five were synonymous U $\rightarrow$ C changes,  
81 whose functional significance is being debated<sup>20,21</sup>, as they are the most common early nucleotide  
82 changes observed in the evolution of SARS-CoV-2<sup>22</sup>.

83 The emergence of  $\mu$  and  $\alpha$  variants before the first reports of COVID-19 implies the existence of  
84 significant sequence diversity in the ancestral SARS-CoV-2 populations. All the 17 genomes from China  
85 sampled in December 2019 carry all three  $\mu$  and three  $\alpha$  variants (Fig. 2d). Interestingly, the six genomes  
86 containing  $\mu$  variants but not  $\alpha$  variants were sampled in China and the United States in January 2020  
87 (Fig. 2d). Therefore, the earliest sampled genomes (including the designated database references) are  
88 not ancestral, and using them as such<sup>23–25</sup> will spuriously predict several reversals or convergent  
89 mutations in the early history of SARS-CoV-2 genomes. For example, the root of SARS-CoV-2 phylogeny  
90 in the GISAID resource is placed between  $\alpha_1$  and  $\alpha_3$  variants in the mutational history<sup>26</sup>. This placement  
91 of root suggests U to be the mutant base and C to be the ancestral base in SARS-CoV-2 at all four  
92 positions (three  $\mu$ 's and  $\alpha_1$ ). This assignment requires four consecutive backward mutations in SARS-

93 CoV-2 or convergent mutations in the bat coronavirus because U is observed at all four positions in  
94 RaTG13. This many backward and convergent mutations in significant frequency would be unusual. In  
95 fact, the likelihood of mutation history constructed using C as the ancestral base was significantly worse  
96 than with U as the ancestral base ( $P \ll 0.01$ ; see also *Methods*). Our inference is also supported by the  
97 observation that a mutant of proCoV2 containing  $\mu$  variants, but no  $\alpha$  variants, was isolated in the  
98 United States on pandemic day 59. This means that the root of the SARS-CoV-2 phylogeny is on a lineage  
99 before  $\alpha_1$  appeared, which is inconsistent with the previous inference<sup>26</sup>.

100 The proCoV2 $\mu$  genome experienced two additional non-synonymous variants ( $\nu$ ) and became a  
101 significant CoV-2 lineage before going extinct a few weeks later (Fig. 1, 3b, and 3f). Therefore, proCoV2  
102 genomes with  $\mu$  variants alone were distributed worldwide and gave rise to new CoV-2 lineages during  
103 the pandemic. The discovery of these patterns was possible by mutation order analysis and the use of  
104 proCoV2 as a reference, which enables improved molecular evolutionary and phylogenetic analyses of  
105 COVID-19.

106 *Mutations after the first reports of COVID-19.* A non-synonymous variant of the Spike protein (p.D614G,  
107  $\beta_2$ ) of proCoV2 $\mu\alpha$  genome and two other variants, one synonymous ( $\beta_1$ ) and one non-synonymous ( $\beta_3$ )  
108 variant of ORF 1ab, co-occur in ~77% of the genomes ( $\beta$  variants). The first two of these variants were  
109 detected on pandemic day 31 in China and day 35 in Europe. These two variants are almost always  
110 sampled together (Fig. 1). The  $\beta_3$  mutant was found soon after to complete form the  $\beta$  lineage. It was  
111 first sampled in Saudi Arabia on pandemic day 41 and then in Europe on pandemic day 54.

112 Interestingly,  $\beta_3$  was not observed in Chinese samples until pandemic day 69. By that time, the  $\beta$  lineage  
113 had already been established worldwide. As a result of highly uneven and sparse sampling of genomes  
114 across the globe during the early phases of the pandemic (Fig. 2e), one cannot exclude the possibility  
115 that  $\beta$  variants first arose outside China, possibly the Middle East or Europe. Regardless, the three  $\beta$   
116 variants preceded the coronavirus expansion in Europe two months after the pandemic began (Fig. 3b  
117 and 3e). Because of its co-occurrence with the Spike variant p.D614G, the role of the non-synonymous  
118 ORF1ab  $\beta_3$  mutant is likely to become attractive to investigate experimentally, as several studies have  
119 argued that the Spike variant increases the infectivity and facilitates the spread of COVID-19, albeit  
120 without detectable clinical consequences<sup>27-34</sup>.

121 The frequency of  $\beta$  variants has approached fixation in the SARS-CoV-2 population worldwide (Fig. 3B).  
122 However, this increase has occurred concomitantly with, or possibly driven by, their descendant  
123 lineages (Fig. 3c). One lineage from proCoV2 $\mu\alpha\beta$  was founded by three mutations ( $\epsilon$ ) of the  
124 nucleocapsid protein (N) protein (Fig. 1). It was first seen in genomes sampled on pandemic day 54 in  
125 Europe. This lineage (proCoV2 $\mu\alpha\beta\epsilon$ ) has become dominant in the European region, replacing most  
126 other lineages (Fig. 3e). All three  $\epsilon$  mutants occur in adjacent codons of the N protein and are non-  
127 synonymous changes involving the Arginine residues. The net result of the three  $\epsilon$  mutations is the gain  
128 of an Arginine, which increases the positive charge of the protein, an essential property for the N  
129 protein's nucleic acid binding function that is critical for virus transcription and assembly<sup>35</sup>. Because all

130 three  $\epsilon$  variants are always found together and are increasing in frequency in Asia and Europe, they  
131 may have hitchhiked with or driven the increase in the frequency of the Spike p.D614G variant.

132 The second evolutionary lineage to emanate from proCoV2 $\mu\alpha\beta$  was founded by a mutation ( $\gamma$ ) that,  
133 along with its descendant genome containing a  $\delta$  mutation, gave rise to the most common  
134 coronaviruses in North America today (Fig. 3f). The  $\gamma$  variant was first detected on day 41 in Saudi Arabia  
135 (98 samples). The  $\delta$  variant was first found in Singapore on pandemic day 54 (25 samples). They both  
136 appeared in Europe on pandemic day 59, underwent a limited spread for a few weeks, but did not  
137 become common (Fig. 3e). Because neither of these variants was detected in China until later  
138 (pandemic day 79), they may have originated in other regions of the world.

139 The presence of the  $\gamma$  and  $\delta$  variants in and around Europe by pandemic day 59 and their subsequent  
140 appearance in eastern North America (first detected on pandemic day 66) is consistent with the  
141 suggestion that, early on, coronaviruses from Europe seeded infections in eastern North America<sup>36</sup>. As  
142 for the Asian seeding of infections in western North America<sup>37</sup>,  $\mu$  and  $\mu\alpha$  originated in China and  
143 dominated in the earliest phases of the pandemic. However, these mutants were replaced a few weeks  
144 later by  $\mu\nu$  genomes that were first isolated on pandemic day 59 in western North America and those  
145 found in eastern North America ( $\mu\alpha\beta\gamma\delta$  genomes) (Fig. 3f). In recent months, the spatiotemporal  
146 pattern in North America has been led by the expansion of proCoV2 $\mu\alpha\beta\gamma\delta$  genomes (Fig. 3f).

147 Overall, Asian spatiotemporal patterns of coronavirus lineages are more similar to European regions,  
148 where  $\mu\alpha\beta$  genomes with  $\epsilon$  variants have become common (Fig. 3d). These patterns are very different  
149 from North American regions where  $\epsilon$  remains a minority and  $\mu\alpha\beta$  genomes with  $\gamma$  and  $\delta$  variants  
150 dominate (Fig. 3f). Therefore, spatiotemporal patterns have converged between Europe and Asia, both  
151 of which have diverged from North America.

## 152 **Molecular phylogeny of SARS-CoV-2 genomes**

153 The progression of mutations shown in figure 1 predicts observed and extinct genomes by tracking  
154 mutational history from the progenitor sequence. Therefore, it directly transforms into a phylogeny of  
155 genomes; each node (leaf and internal) represents a genome type containing all the mutations on the  
156 path from that node to the progenitor proCoV2 (Fig. 2a). This phylogeny is a rooted tree of SARS-CoV-  
157 2, which has been challenging to infer reliably<sup>1-8</sup>. It shows that all the early novel coronavirus lineages  
158 were established by three  $\mu$  mutations, all of which were first seen in genomes sampled in China. In  
159 fact, the next five major mutations ( $\alpha_1 - \alpha_3$  and  $\beta_1 - \beta_2$ ) were also detected first in China, indicating that  
160 the proCoV2 originated and evolved in China.

161 Genomes containing early mutations spread to other parts of the world, and they gave rise to new  
162 lineages much later. For example, a genome with three  $\mu$  SNVs mutated to establish the  $\nu$  lineage that  
163 likely arose many weeks after the pandemic began (sampled on day 59), spread extensively (4.7% of  
164 the genomes in 29KG), and remained restricted to North America. A mutant of the genome containing  
165  $\mu$  and  $\alpha_1$  SNVs gave rise to a significant offshoot ( $\alpha_{1a}$ ) more than two months after the pandemic began

166 (pandemic day 63 in France). The genome harboring  $\mu$  and  $\alpha$  SNVs underwent three successive  
167 mutations, including Spike p.D614G, to establish the  $\beta$  lineage. This lineage gave rise to two major  
168 clades: one founded by  $\gamma$  and  $\delta$  mutations that became predominant in North America. The other was  
169 founded by  $\epsilon$  mutations that became predominant in Europe and Asia. Many of these major  
170 divergences in the early evolutionary history of SARS-CoV-2 have not been apparent from previous work  
171 due to difficulty in rooting and interpreting SARS-CoV-2 phylogenies<sup>1-7</sup>.

172 Mutational barcodes for coronavirus genome classification. Each node in the mutation-based  
173 phylogeny in figure 2A can be represented by a binary barcode containing the presence/absence of 49  
174 variants—a system that provides an intuitive mutational signature approach to classifying genomes (see  
175 *Methods*). We mapped genomes from the 29KG dataset to each node based on these signatures and  
176 represented high and low genome counts by open and closed circles and triangles (Fig. 2a). A  
177 comparison of our mutation-based classification with a widely used phylogeny-based classification<sup>26</sup>  
178 revealed many similarities (see Extended Data Figure 1). However, several significant differences  
179 between classification schemes arose, likely caused by the use of early coronavirus samples to root  
180 SARS-CoV-2 phylogeny and the difficulty in reliably staging the earliest divergence events.

181 Episodic accumulation of variants. The numbers of genomes mapping to many ancestral nodes in the  
182 SARS-CoV-2 phylogeny are relatively small (represented by open circles and triangles in Fig. 2a). In  
183 particular, the number of genomes with both  $\alpha_2$  and  $\alpha_3$  variants is more than 20-times more than those  
184 containing only the  $\alpha_2$  variant (1,116 versus 47 genomes). Similarly, the number of genomes with all  
185 three  $\beta$  variants (3,032) exceeds those with predecessor  $\beta_1$  and  $\beta_2$  mutants (40 and 9 genomes,  
186 respectively). The three  $\epsilon$  variants always occur together (5,365 genomes), with other combinations of  
187  $\epsilon$  variants found in only two genomes (Extended Data Table 1). Similar trends are observed for many  
188 other offshoots, as well. This clustering of mutants suggests an episodic nature of variants spread ( $P <$   
189  $0.01$ , *Methods*), which may arise from founder effects, positive selection, or both (e.g., ref.<sup>20</sup>). However,  
190 such inferences of evolutionary and epidemiological mechanisms are complicated by highly uneven  
191 regional and temporal genome sequencing that is unlikely to produce an unbiased representative  
192 sample of the actual worldwide population (Fig. 2e).

193 In this phylogeny, the proportion of non-synonymous to synonymous changes (N/S) is 1.9. This ratio is  
194 almost 10-times larger than the ratio of 0.18 for the inferred proCoV2 and observed Bat CoV proteins.  
195 A McDonald-Kreitman test<sup>38</sup> rejects the similarity of molecular evolutionary patterns observed within  
196 the SARS-CoV-2 population (29KG dataset) and between human proCoV2 and the bat coronavirus. It is  
197 not prudent to automatically invoke the action of positive selection using such neutrality tests, because  
198 synonymous polymorphisms in SARS-CoV-2 genomes are affected by molecular mechanisms (e.g., RNA  
199 editing)<sup>21,39</sup> as well as negative selection<sup>21</sup>. Also, even slightly deleterious alleles can become common  
200 when there is a population expansion<sup>40</sup>. Furthermore, we cannot assume that all non-synonymous and  
201 synonymous differences between human CoV-2 and bat CoV sequences are neutral<sup>20</sup>. Nevertheless,  
202 N/S patterns do show that molecular evolutionary patterns observed within SARS-CoV-2 genomes

203 infecting humans are different from those spanning the divergence between the bat RaTG13 and  
204 proCoV2 strains.

205 In conclusion, the approach taken here to discover key mutational events, a timeline of their evolution,  
206 and spatial distributions of variants and evolutionary lineages will generally be applicable for analyzing  
207 pathogens during the early stages of outbreaks. The approach is scalable for even bigger datasets  
208 because it does not require more phylogenetically informative variants with an increasing number of  
209 samples. In fact, it benefits from bigger datasets as they afford more accurate estimates of individual  
210 and co-occurrence frequencies of variants and enable more reliable detection of lower frequency  
211 variants. Its application to an extensive collection of SARS-CoV-2 genomes has facilitated the  
212 reconstruction of the progenitor viral genome and the identification of mutant lineages, empowering  
213 the tracking of distinct SARS-CoV-2 lineages over time and space, improving our understanding of the  
214 past, current, and future evolution of SARS-CoV-2 and COVID-19. An initial implementation of a  
215 regularly updated SARS-CoV-2 phylogeny and global spatiotemporal patterns utilizing GISAID data is  
216 available from <http://igem.temple.edu/COVID-19> (an early beta version).

217



218

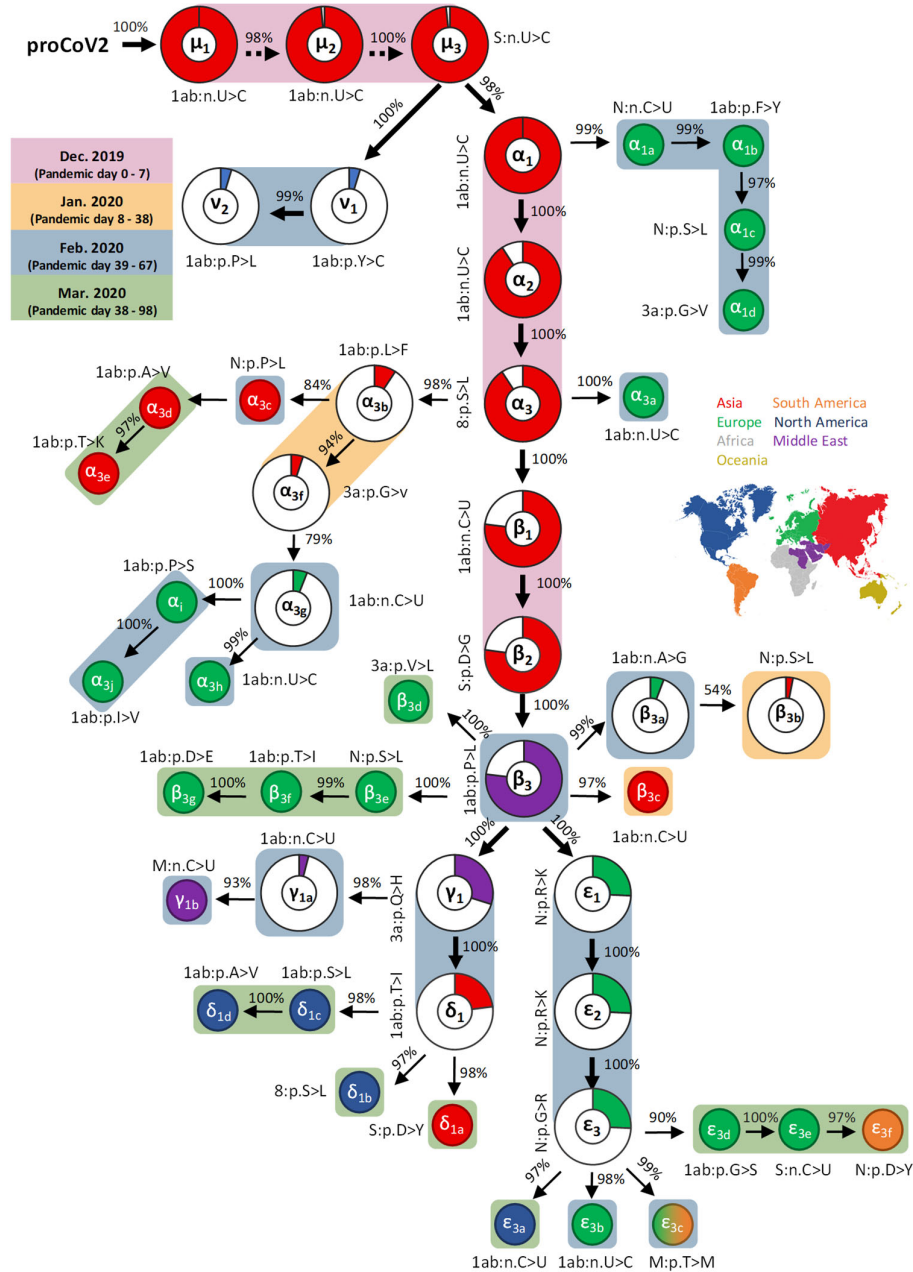

219

220 **Fig. 1.** Mutational history graph of SARS-CoV-2. Thick arrows mark the pathway of widespread variants  
 221 (frequency,  $vf \geq 5\%$ ), and thin arrows show paths leading to other common mutations ( $5\% > vf > 1\%$ ).  
 222 The size of the pie in pie-charts is proportional to variant frequency in the 29KG dataset, with pie-charts  
 223 shown for variants with  $vf > 3\%$  and pie color based on the region of the world where that mutation  
 224 was first observed. A circle is used for all other variants, with the filled color corresponding to the  
 225 earliest sampling region. The co-occurrence index of each mutation and its predecessor mutation is  
 226 shown next to the arrow connecting them. Base changes (n.) are shown for synonymous mutations,  
 227 and amino acid changes (p.) are shown for non-synonymous mutations along with the gene/protein  
 228 names ("ORF" is omitted from gene name abbreviations given in Extended Data Table 1). A rounded  
 229 rectangular background indicates the earliest month in which a mutation was first found. More details  
 230 on each mutation are presented in Extended Data Table 1.

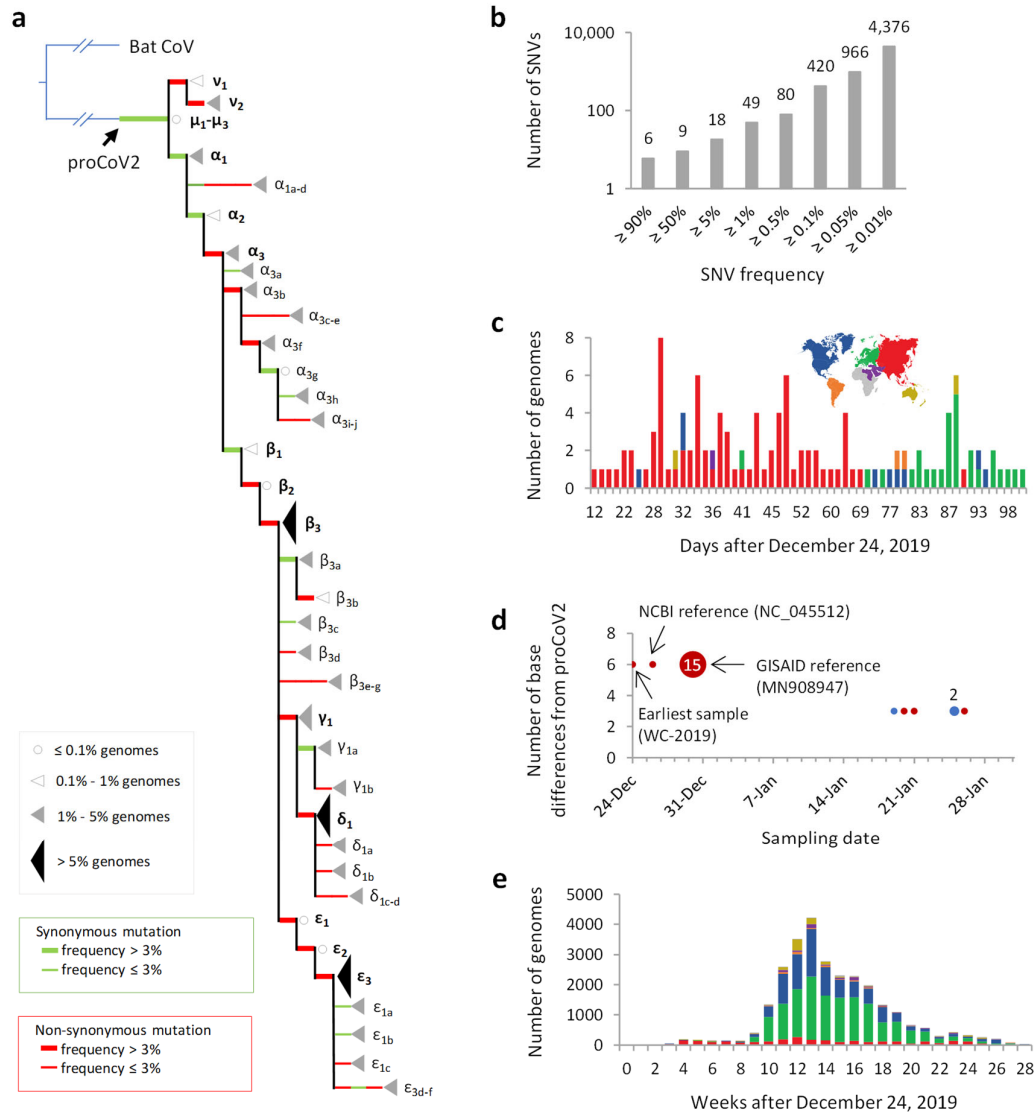

231

232 **Fig. 2.** Evolutionary divergence and history of SARS-CoV-2. (a) A waterfall display of genome phylogeny  
 233 recapitulating the mutation graph in figure 1. The numbers of genomes mapped to each node are  
 234 depicted by open circles (very few genomes), open triangles (few genomes), small gray triangles (many  
 235 genomes), and large black triangles (very many genomes). The tip label is the name of the mutation on  
 236 the connecting branch. Green and red branches are synonymous and non-synonymous mutations,  
 237 respectively. Thick branches mark mutations that occur with a frequency greater than 3% in the 29KG  
 238 data. (b) Cumulative count of single nucleotide variants present in the 29KG genome dataset at  
 239 different frequencies. (c) Temporal and spatial distribution of strains identical to proCoV2 on amino  
 240 acid sequence level, i.e., they have only synonymous differences. (d) The number of base differences  
 241 from proCoV2 for genomes that were sampled in December 2019 and January 2020. The 17 genomes  
 242 sampled in December 2019 in China (red) have six common SNVs different from proCoV2, whereas six  
 243 genomes sampled in January 2020 in China (Asia, red) and USA (North America, blue) show only three  
 244 bases differences. A circle marks the presence of genome, with multiple genomes (2 and 15) sampled  
 245 on two different days. (e) The number of genomes in the 29KG collection that were isolated weekly  
 246 during the pandemic. The color scheme used to mark sampling locations is shown in panel c.

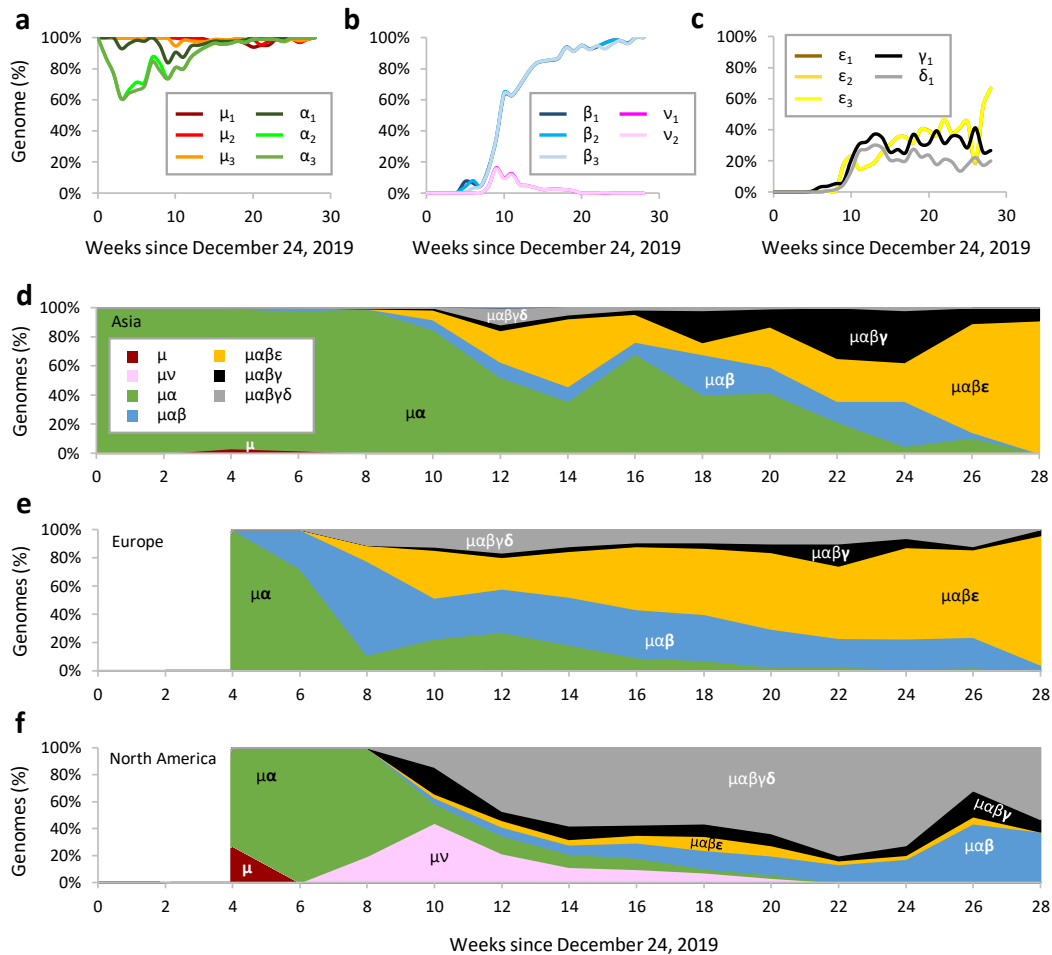

247

248 **Fig. 3.** Spatiotemporal dynamics of SARS-CoV-2 genomes. (a-c) Temporal patterns of frequencies of  
 249 major variants. The proportion of genomes containing each major mutant is calculated for each week  
 250 on and after 24 December 2019 and then connected using a smoothed line. (d-f) Spatiotemporal  
 251 patterns of genomes mapped to lineages containing different combinations of major variants in Asia,  
 252 Europe, and North America. The number of genomes mapped to mutation lineages (e.g., proCoV2 $\mu\alpha$   
 253 contains  $\mu_1 - \mu_3$  and  $\alpha_1 - \alpha_3$  variants) is counted biweekly to generate this stacked line graph. The area  
 254 is the proportion of genomes mapped to the corresponding lineage in the two-week time frame. To  
 255 simplify the display, "proCoV2" is omitted from the lineage names. There was not a sufficient number  
 256 of genomes sampled from Europe and North America in the first four weeks.

257

## 258 **Methods**

### 259 Genome data acquisition and processing

260 We downloaded SARS-CoV-2 genomes from the GISAID<sup>41</sup> database along with information on sample  
261 collection dates and locations. Of all the genomes downloaded, we only retained those with greater  
262 than 28,000 bases and marked as originating from human hosts. Each genome was subjected to codon-  
263 aware alignment with the NCBI reference genome (accession number NC\_045512) and then subdivided  
264 into ten regions based on CDS features: ORF1a (including nsp10), ORF1b (starting with nsp12), S, ORF3a,  
265 E, M, ORF6, ORF7a, ORF8, N, and ORF10. Gene ORF7b was removed because it was too short for  
266 alignment and comparisons. For each region, we scanned and discarded sequences that contained too  
267 many ambiguous nucleotides in order to remove data with too many sequencing errors. Thresholds  
268 were 0.5% for the S gene, 0.1% for ORF1a and ORF1b genes, and 1% for all other genes. We mapped  
269 individual sequences to the NCBI reference genome (NC\_045512) using a codon-aware extension to  
270 the Smith-Waterman algorithm implemented in HyPhy<sup>42</sup> ([https://github.com/veg/hyphy-](https://github.com/veg/hyphy-analyses/tree/master/codon-msa)  
271 [analyses/tree/master/codon-msa](https://github.com/veg/hyphy-analyses/tree/master/codon-msa)), translated mapped sequence to amino-acids and performed  
272 multiple protein sequence alignment with the ----auto settings function of MAFFT (version 7.453)<sup>43</sup>.  
273 Codon sequences were next mapped onto the amino-aid alignment. The multiple sequence alignment  
274 of SARS-CoV-2 genomes was aligned with the sequence of the coronavirus genome of the *Rhinolophus*  
275 *affinis* bat (RaTG13)<sup>19</sup> and visually inspected and adjusted in MEGA X<sup>44,45</sup>. Ultimately, the final alignment  
276 contained all genomic regions except ORF7b and non-coding regions (5' and 3' UTRs, and intergenic  
277 spacers). After these filtering and alignment steps, the multiple sequence alignment contained 29,115  
278 sites and 29,681 SARS-CoV-2 genomes, which we refer to as the 29KG dataset.

### 279 Reference genomes and collection dates

280 We used the dates of viral collections provided by the GISAID database<sup>41</sup> in all our analyses. All genomes  
281 were used in the mutation ordering analyses, but genomes with incomplete sampling dates were  
282 excluded from the spatiotemporal analyses and derived interpretations. We noted that the earliest  
283 sample included in GISAID, (ID: EPI\_ISL\_402123), was collected on 24 December 2019, although the  
284 NCBI website lists its collection date as 23 December 2019 (GenBank ID: MT019529). Therefore, we  
285 used the GISAID collection date for the sake of consistency. Regarding the NCBI reference genome  
286 (GenBank ID: NC\_045512)<sup>46</sup>, this sample was collected on 26 December 2019<sup>47</sup>. The collection date for  
287 the GISAID reference genome (GenBank ID: MN908947) is listed as 31 December 2019<sup>48</sup>, although the  
288 patient was reported sick and admitted into the hospital on 26 December 2019<sup>46</sup>. Thus, in our analyses,  
289 we used the GISAID collection date of 31 December 2019 for the GISAID reference genome to be  
290 consistent with previous studies.

### 291 Mutation order analyses (MOA)

292 We used a maximum likelihood method, SCITE<sup>11</sup>, and variant co-occurrence analysis for reconstructing  
293 the order of mutations corresponding to 49 common variants (frequency > 1%) in the 29KG dataset.

294 MOA has demonstrated high accuracy for analyzing tumor cell genomes that reproduce clonally, have  
295 sequencing errors, and exhibit limited sequence divergence<sup>11,12</sup>. In MOA, higher frequency variants are  
296 expected to have arisen earlier than low-frequency variants in clonally reproducing populations<sup>11,14</sup>.  
297 Using the highest frequency variants to anchor the analysis and the shared co-occurrence of variants  
298 among genomes to order mutations, while allowing probabilistically for sequencing errors and pooled  
299 sequencing of genomes<sup>11</sup>, we evaluated and compared the likelihood of various possible mutational  
300 histories. MOA is different from traditional phylogenetic approaches where positions are treated  
301 independently, i.e., the shared co-occurrence of variants is not directly utilized in the inference  
302 procedure. Notably, both traditional phylogenetic and mutation order analyses are expected to  
303 produce concordant patterns when sequencing errors and other artifacts are minimized. However,  
304 sequencing errors and limited mutational input during the coronavirus history adversely impact  
305 traditional methods<sup>1,4,7</sup>, as does the fact that the closest coronaviruses useable as outgroups have more  
306 than a thousand differences from SARS-CoV-2 genomes that only differ in a handful of bases from each  
307 other<sup>1,4</sup>.

308 MOA requires a binary matrix of presence/absence of mutant for 29KG. We first designated differences  
309 from the bat RaTG13 genome by "1," otherwise a "0" was assigned. This was simply an initial seed for  
310 the analysis, as subsequent iterations coded RaTG13 bases as the mutant ("1") for each position  
311 individually and selected the coding that produced mutation graphs with the highest maximum  
312 likelihood and average shared co-occurrence index (COI) of variants. COI for a given variant ( $y$ ) is the  
313 number of genomes that contain  $y$  and its directly preceding mutation ( $x$ ) divided by the number of  
314 genomes that contain  $y$ . At the genomic position 25563, RaTG13 base A was not present except in one  
315 genome in the 29KG dataset, so we assigned the mutant status to the minority base (U;  $vf = 29.8\%$ ) and  
316 the reference status to the majority base (G), an assumption that was tested in the same way as above.  
317 All missing and ambiguous bases were coded to be ignored (missing data) in all the analyses.

318 In SCITE analyses, we first used default parameter settings of false-negative rate (FNR = 0.21545) and  
319 false-positive rate (FPR = 0.0000604). We carried out ten independent runs to ensure stability and  
320 convergence in analyzing a matrix of  $49 \times 29861$  (SNVs  $\times$  genomes). The mutation graph with the highest  
321 log likelihood ( $\ln L = -204,622.9$ ) was used to obtain 29KG collection-specific estimates of FNR and FPR  
322 by comparing the observed and predicted sequences based on this mutation graph. These estimated  
323 FNR (0.0202) and FPR (0.0491) were very different from the SCITE default parameters, where estimated  
324 FNR was much lower, whose use in SCITE produced mutation history graphs with a much higher log-  
325 likelihood ( $\ln L = -84,134.5$ ). This difference in error rates is unsurprising because we used only common  
326 variants ( $vf > 1\%$ ), and the 29KG dataset was not obtained from single-cell sequencing, in which the  
327 allele dropout during single-cell sequencing elevates FNR, i.e., mutant alleles are not sequenced.

328 We then reversed ancestor/mutant coding for each variant to ensure that the orientation of each  
329 mutation was optimal. 49 datasets were subjected to SCITE analyses (FNR = 0.0202 and FPR = 0.0491).  
330 The initial assignment of the RaTG13 base to be the ancestor was supported for 47 positions. The log-

331 likelihood of mutation graphs with those assignments was significantly higher than the alternative ( $P$   
332  $\ll 0.01$  using the AIC protocol in ref.<sup>49</sup>). This means that the Bat CoV base is likely the ancestral base  
333 for 95.9% of the variants with a frequency greater than 1%, similar to the pairwise sequence similarity  
334 observed between SARS-CoV-2 and RaTG13 CoV genomes (~96%). At one (position 25563) of the  
335 remaining two positions, the mutation history with the majority base (G) as the ancestral state received  
336 a significantly higher likelihood ( $P \ll 0.01$ ). At the other position (3037), mutation history graphs from  
337 base C received significantly higher likelihood support ( $\Delta \ln L = 1621.7$ ) than base U, which indicated that  
338 the RaTG13 base (U) was not ancestral. In this case, the co-occurrence index was also much higher for  
339 the mutation history graph generated by using base C as the ancestor (91%). Therefore, we re-coded  
340 the column for position 3037 and generated a new  $49 \times 29861$  (SNVs  $\times$  genomes) matrix to conduct a  
341 SCITE analysis. It produced a mutation graph with much higher log-likelihood ( $\ln L = -25,979.1$ ) and  
342 lower FNR = 0.00537 and FPR = 0.00193.

343 We then used the above analysis settings and performed 100 runs of SCITE. Ninety-five mutation history  
344 graphs with the best log-likelihood ( $\ln L = -25,979.1$ ) were found. We chose the mutation graph with  
345 the highest average COI (97%) and presented it in figure 1. In this mutation graph, COI for each variant  
346 is shown next to the arrow, and an arrow is drawn with a dotted line if it occurred in fewer than a  
347 majority of the equally likely graphs. Based on the direction of the mutations in 49 SNVs, we generated  
348 the sequence of the progenitor SARS-CoV-2 (proCoV2). We have made available the proCoV2 genome  
349 sequence in FastA format at <http://igem.temple.edu/COVID-19>, which is the same as the NCBI  
350 reference genome with base differences (positions 2416, 19524, 23929, 18060, 8782, and 28144) as  
351 discussed in the text.

352 Temporal concordance. Because mutation ordering analysis analyses did not use spatial or temporal  
353 information for genomes or mutations, it can be validated by evaluating the concordance of the  
354 inferred order of mutations with the timing of their first appearance ( $tf$ ). For a mutation  $i$ , we compared  
355 its  $tf_i$  with the  $tf_j$  such that  $j$  is the nearest preceding mutation in the mutation graph for which  $tf_i \neq tf_j$ .  
356 The condition was met for 47 out of 49 mutations (95.9%). Two offshoot mutants of ( $\beta_3$ ) were sampled  
357 earlier than their predecessors by ten days. COI of one variant ( $\beta_{3b}$ ) was low (54%), but the other variant  
358 ( $\beta_{3c}$ ) showed a very high COI (97%).

### 359 **Genome phylogeny and classification based on the mutation order**

360 Each node in the mutational history graph predicts an intermediate (ancestral) or a tip sequence, which  
361 contains all the mutations from that node to the root of the mutation graph. Then, the phylogeny of  
362 these sequences is the same as the topology of the mutation history graph that is drawn as a directional  
363 graph anchored on the root node. Every node in the mutation-based phylogeny (Fig. 2a) was encoded  
364 in a mutational signature consisting of a binary barcode showing the presence/absence of 49 variants.  
365 We mapped each of the 29K genomes to a node in the phylogeny based on the highest sequence  
366 similarity at positions containing 49 common SNVs. Mismatches were allowed, as sequencing errors  
367 could create them. A small fraction of genomes (1.8%) could not be mapped unambiguously to one



368 node, so they were excluded and investigated in the future. The number of genomes assigned to each  
369 node is shown in Extended Data Table 1.

370 We compared our mutational classification with a phylogeny-based classification<sup>26</sup> obtained using the  
371 Pangolin service (v2.0.3; <https://pangolin.cog-uk.io/>). Sequences from our alignment were submitted  
372 to the Pangolin website one-by-one, and a clade designation was received. The results are summarized  
373 in Extended Data Figure 1. In this table, all phylogenetic-groups with fewer than 20 genomes were  
374 excluded. Of the 80 phylogenetic groups shown, 74 are defined primarily by a single mutation-based  
375 barcode, as more than 90% of the genomes in those phylogenetic groups share the same barcode. This  
376 includes all small and medium-sized phylogenetic groups (up to 488 genomes) and two large groups  
377 (A.1 with 1,377 genomes and B.1.2 with 749 genomes). One large group, B.1.1, predominately connects  
378 with  $\epsilon_3$  node (79%, 4,832 genomes), but some of its members belong to  $\epsilon_3$  offshoots because they  
379 contain respective diagnostic mutations. For group B.1.1.1, two other  $\epsilon_3$  offshoots are mixed up almost  
380 equally. Three other large differences between mutational barcoding and phylogeny-based grouping  
381 are seen for A, B, B.1.1, and B.2 groups. These differences are likely because the location of the root, as  
382 well as the earliest branching order of coronavirus lineages, is problematic in phylogeny-based  
383 classifications<sup>1,4,6,7</sup>. Overall, our mutation-based classification is more intuitive and can have higher  
384 resolution.

#### 385 *Tests for neutral evolution and episodic spread of variants*

386 We tested the null hypothesis of the same molecular evolutionary patterns within the SARS-CoV-2  
387 population and between species (i.e., Human SARS-CoV-2 and Bat RaTG13) by using a McDonald-  
388 Kreitman test<sup>38</sup>. The numbers of non-synonymous and synonymous polymorphisms with a frequency  
389 greater than 1% were 32 and 17, compared with the numbers of non-synonymous and synonymous  
390 fixed differences (170 and 958, respectively) inferred between proCoV2 and bat RaTG13 sequences.  
391 The McDonald-Kreitman test rejected the null overwhelmingly in a 2×2 contingency table analysis ( $P$   
392  $\ll 0.01$ ).

393 We performed non-parametric Wald–Wolfowitz runs-tests<sup>50,51</sup> to examine the temporally episodic  
394 spread of common mutants. Only one of the first six mutations was used because they were all sampled  
395 first on pandemic day 0. A test using 44 variants rejected the null hypothesis ( $P < 0.01$ ) as did a test in  
396 the analysis that was restricted to variants with frequencies greater than 5% ( $P < 0.05$ ). Therefore, the  
397 non-random spread of variants is statistically significant.

398 **Data Availability and Code Availability:** Live evolutionary history and spatiotemporal distributions of  
399 common variants are available at <http://igem.temple.edu/COVID-19> (beta version). All genome  
400 sequences and metadata are available publically at GISAID (<https://www.gisaid.org/>) and predicted  
401 proCoV2 sequence is available at <http://igem.temple.edu/COVID-19>. The other relevant information is  
402 provided in the supplementary materials.

## 403 References

- 404 1. Pipes, L., Wang, H., Huelsenbeck, J. & Nielsen, R. Assessing uncertainty in the rooting of the  
405 SARS-CoV-2 phylogeny. *bioRxiv* (2020) doi:10.1101/2020.06.19.160630.
- 406 2. Lai, A., Bergna, A., Acciarri, C., Galli, M. & Zehender, G. Early phylogenetic estimate of the  
407 effective reproduction number of SARS-CoV-2. *J. Med. Virol.* **92**, 675–679 (2020).
- 408 3. Castells, M., Lopez-Tort, F., Colina, R. & Cristina, J. Evidence of Increasing Diversification of  
409 Emerging SARS-CoV-2 Strains. *J. Med. Virol.* 1–8 (2020).
- 410 4. Mavian, C. *et al.* Sampling bias and incorrect rooting make phylogenetic network tracing of SARS-  
411 COV-2 infections unreliable. *Proc. Natl. Acad. Sci. U. S. A.* **117**, 12522–12523 (2020).
- 412 5. Andersen, K. G., Rambaut, A., Lipkin, W. I., Holmes, E. C. & Garry, R. F. The proximal origin of  
413 SARS-CoV-2. *Nat. Med.* **26**, 450–452 (2020).
- 414 6. Wenzel, J. Origins of SARS-CoV-1 and SARS-CoV-2 are often poorly explored in leading  
415 publications. *Cladistics* **36**, 374–379 (2020).
- 416 7. Morel, B. *et al.* Phylogenetic analysis of SARS-CoV-2 data is difficult. *bioRxiv* (2020)  
417 doi:10.1101/2020.08.05.239046.
- 418 8. Gómez-carballa, A., Bello, X., Pardo-seco, J., Martinon-Torres, F. & Salas, A. genome variation  
419 worldwide highlights the impact of COVID-19 super-spreaders. *Genome Res.* (2020)  
420 doi:10.1101/gr.266221.120.
- 421 9. Nei, M. & Kumar, S. *Molecular Evolution and Phylogenetics*. (Oxford University Press, 2002).
- 422 10. van Dorp, L. *et al.* Emergence of genomic diversity and recurrent mutations in SARS-CoV-2.  
423 *Infect. Genet. Evol.* **83**, 104351 (2020).
- 424 11. Jahn, K., Kuipers, J. & Beerwinkler, N. Tree inference for single-cell data. *Genome Biol.* **17**, 1–  
425 17 (2016).
- 426 12. Miura, S. *et al.* Computational enhancement of single-cell sequences for inferring tumor  
427 evolution. *Bioinformatics* **34**, i917–i926 (2018).
- 428 13. Ross, E. M. & Markowitz, F. OncoNEM: Inferring tumor evolution from single-cell sequencing  
429 data. *Genome Biol.* **17**, 1–14 (2016).
- 430 14. Kim, K. I. & Simon, R. Using single cell sequencing data to model the evolutionary history of a  
431 tumor. *BMC Bioinformatics* **15**, (2014).
- 432 15. Fauver, J. R. *et al.* Coast-to-Coast Spread of SARS-CoV-2 during the Early Epidemic in the United  
433 States. *Cell* **181**, 990-996.e5 (2020).
- 434 16. Tang, X. *et al.* On the origin and continuing evolution of SARS-CoV-2. *Natl. Sci. Rev.* **7**, 1012–1023  
435 (2020).
- 436 17. Dearlove, B. L. *et al.* A SARS-CoV-2 vaccine candidate would likely match all currently circulating  
437 strains. *bioRxiv* (2020) doi:10.1101/2020.04.27.064774.
- 438 18. Stefanelli, P. *et al.* Whole genome and phylogenetic analysis of two SARSCoV-2 strains isolated  
439 in Italy in January and February 2020: Additional clues on multiple introductions and further  
440 circulation in Europe. *Eurosurveillance* **25**, 1–5 (2020).
- 441 19. Zhou, P. *et al.* A pneumonia outbreak associated with a new coronavirus of probable bat origin.  
442 *Nature* **579**, 270–273 (2020).
- 443 20. MacLean, O. A. *et al.* Natural selection in the evolution of SARS-CoV-2 in bats, not humans,  
444 created a highly capable human pathogen. *bioRxiv* (2020) doi:10.1101/2020.05.28.122366.
- 445 21. Rice, A. M. *et al.* Evidence for strong mutation bias towards, and selection against, U content in  
446 SARS-CoV-2: implications for vaccine design. *Molecular Biology and Evolution* (2020).  
447 doi:10.1093/molbev/msaa188.
- 448 22. Matyášek, R. & Kovařík, A. Mutation patterns of human SARS-CoV-2 and bat RaTG13  
449 coronaviruses genomes are strongly biased towards C>U indicating rapid evolution in their  
450 hosts. *Genes (Basel)* **11**, 761 (2020).
- 451 23. Castillo, A. E. *et al.* Phylogenetic analysis of the first four SARS-CoV-2 cases in Chile. *J. Med. Virol.*  
452 **92**, 1562–1566 (2020).
- 453 24. Deng, X. *et al.* Genomic surveillance reveals multiple introductions of SARS-CoV-2 into Northern  
454 California. *Science* **369**, 582–587 (2020).
- 455 25. Nextstrain. <https://nextstrain.org/coronavirus/SARS-CoV-2>.
- 456 26. Rambaut, A. *et al.* A dynamic nomenclature proposal for SARS-CoV-2 lineages to assist genomic  
457 epidemiology. *Nat. Microbiol.* (2020) doi:10.1038/s41564-020-0770-5.
- 458 27. Islam, O. K. *et al.* Emergence of European and North American mutant variants of SARS-CoV-2



- 459 in South-East Asia. *Transbound. Emerg. Dis.* **00**, 1–9 (2020).
- 460 28. Chi, X. *et al.* A neutralizing human antibody binds to the N-terminal domain of the Spike protein  
461 of SARS-CoV-2. *Science* **369**, 650–655 (2020).
- 462 29. Luan, J., Lu, Y., Jin, X. & Zhang, L. Spike protein recognition of mammalian ACE2 predicts the host  
463 range and an optimized ACE2 for SARS-CoV-2 infection. *Biochem. Biophys. Res. Commun.* **526**,  
464 165–169 (2020).
- 465 30. Hoffmann, M., Kleine-Weber, H. & Pöhlmann, S. A Multibasic Cleavage Site in the Spike Protein  
466 of SARS-CoV-2 Is Essential for Infection of Human Lung Cells. *Mol. Cell* **78**, 779-784.e5 (2020).
- 467 31. Daniloski, Z. *et al.* The Spike D614G mutation increases SARS-CoV-2 infection of multiple human  
468 cell types. *bioRxiv* (2020) doi:10.1101/2020.06.14.151357.
- 469 32. Yurkovetskiy, L. *et al.* Structural and Functional Analysis of the D614G SARS-CoV-2 Spike Protein  
470 Variant. *bioRxiv* (2020) doi:10.2139/ssrn.3657338.
- 471 33. Korber, B. *et al.* Tracking Changes in SARS-CoV-2 Spike: Evidence that D614G Increases Infectivity  
472 of the COVID-19 Virus. *Cell* **182**, 812-827.e19 (2020).
- 473 34. Wang, Q. *et al.* Structural and Functional Basis of SARS-CoV-2 Entry by Using Human ACE2. *Cell*  
474 **181**, 894-904.e9 (2020).
- 475 35. Zeng, W. *et al.* Biochemical characterization of SARS-CoV-2 nucleocapsid protein. *Biochem.*  
476 *Biophys. Res. Commun.* **527**, 618–623 (2020).
- 477 36. Gonzalez-Reiche, A. S. *et al.* Introductions and early spread of SARS-CoV-2 in the New York City  
478 area. *Science* **369**, 297–301 (2020).
- 479 37. Worobey, M. *et al.* The emergence of SARS-CoV-2 in Europe and the US. *bioRxiv* (2020)  
480 doi:10.1101/2020.05.21.109322.
- 481 38. McDonald, J. H. & Kreitman, M. Adaptive protein evolution at the Adh locus in Drosophila.  
482 *Nature* **351**, 652–654 (1991).
- 483 39. Giorgio, S. Di, Martignano, F., Torcia, M. G., Mattiuz, G. & Conticello, S. G. Evidence for host-  
484 dependent RNA editing in the transcriptome of SARS-CoV-2. *Sci. Adv.* **6**, 1–9 (2020).
- 485 40. Casals, F. & Bertranpetit, J. Human genetic variation, shared and private. *Science* **336**, 39–40  
486 (2012).
- 487 41. Hadfield, J. *et al.* NextStrain: Real-time tracking of pathogen evolution. *Bioinformatics* **34**, 4121–  
488 4123 (2018).
- 489 42. Gianella, S. *et al.* Detection of Minority Resistance during Early HIV-1 Infection: Natural Variation  
490 and Spurious Detection rather than Transmission and Evolution of Multiple Viral Variants. *J.*  
491 *Virology* **85**, 8359–8367 (2011).
- 492 43. Katoh, K. & Standley, D. M. MAFFT multiple sequence alignment software version 7:  
493 Improvements in performance and usability. *Mol. Biol. Evol.* **30**, 772–780 (2013).
- 494 44. Kumar, S., Stecher, G., Li, M., Nknyaz, C. & Tamura, K. MEGA X: Molecular evolutionary genetics  
495 analysis across computing platforms. *Mol. Biol. Evol.* **35**, 1547–1549 (2018).
- 496 45. Stecher, G., Tamura, K. & Kumar, S. Molecular evolutionary genetics analysis (MEGA) for macOS.  
497 *Mol. Biol. Evol.* **37**, 1237–1239 (2020).
- 498 46. Wu, F. *et al.* A new coronavirus associated with human respiratory disease in China. *Nature* **579**,  
499 265–269 (2020).
- 500 47. Chiara, M., Horner, D. S., Gissi, C. & Pesole, G. Comparative genomics provides an operational  
501 classification system and reveals early emergence and biased spatio-temporal distribution of  
502 SARS-CoV-2. *bioRxiv* (2020) doi:10.1101/2020.06.26.172924.
- 503 48. Wei, Yulong; Sike, Jordan R.; Aris, Parisa; Xia, X. Coronavirus genomes carry the signatures of  
504 their habitats. *bioRxiv* (2020) doi:10.1101/2020.06.13.149591.
- 505 49. Pupko, T., Huchon, D., Cao, Y., Okada, N. & Hasegawa, M. Combining multiple data sets in a  
506 likelihood analysis: Which models are the best? *Mol. Biol. Evol.* **19**, 2294–2307 (2002).
- 507 50. Wald, A. & Wolfowitz, J. On a Test Whether Two Samples are from the Same Population. *Ann.*  
508 *Math. Stat.* **11**, 147–162 (1940).
- 509 51. Mateus, A. & Caeiro, F. An R implementation of several randomness tests. *AIP Conf. Proc.* **1618**,  
510 531–534 (2015).
- 511
- 512

513 **Acknowledgments**

514 We thank all the authors and organizations who have kindly deposited and shared genome data on  
515 GISAID (see <http://igem.temple.edu/COVID-19> for a list of all the authors). We thank Ananias Escalante,  
516 Rob Kulathinal, Li Liu, Jose Barba-Montoya, Antonia Chroni, Ravi Patel, and Caryn Babaian for critical  
517 comments. We appreciate the technical support provided by Jared Knoblauch and Glen Stecher. This  
518 research was supported by grants from the U.S. National Science Foundation to S.K. (GCR-1934848 and  
519 DEB-2034228) and S.P. (DBI-2027196) and from the U.S. National Institutes of Health to S.K. (GM-  
520 0126567) and S.P. (AI-134384).

521 **Author Contributions**

522 S.K. conceived the project, designed analyses and visualizations, conducted analyses, and wrote the  
523 manuscript. S.M. designed and conducted analyses. S.P., S.W., and M.A.C.O. assembled sequence  
524 alignments. M.A.C.O., S.M., S.S., and Q.T. conducted analyses and rendered visualizations. S.P. and S.W.  
525 developed interactive visualizations. All authors intellectually contributed by discussing results and  
526 patterns, and everyone contributed to writing the manuscript.

527 **Competing Interests**

528 The authors declare that they have no competing interests.

529 **Additional Information**

530 **Supplementary Information** is available for this paper. Correspondence and requests for materials  
531 should be addressed to [s.kumar@temple.edu](mailto:s.kumar@temple.edu). Reprints and permissions information is available at  
532 [www.nature.com/reprints](http://www.nature.com/reprints).

533

534 **Extended Data Table 1.** SARS-CoV-2 variants and their molecular types and first timing and location.

| Mutant (major) | Mutant (minor)  | Gene   | Genomic Position | Nucleotide change | Amino acid change | Time (days) | Variant Frequency | Genomes mapped | First location            |
|----------------|-----------------|--------|------------------|-------------------|-------------------|-------------|-------------------|----------------|---------------------------|
| $\mu_1$        |                 | ORF1ab | 2416             | U>C               |                   | 0           | 98.1%             | 18             | China, Asia               |
| $\mu_2$        |                 | ORF1ab | 19524            | U>C               |                   | 0           | 98.6%             | 0              | China, Asia               |
| $\mu_3$        |                 | S      | 23929            | U>C               |                   | 0           | 98.4%             | 0              | China, Asia               |
| $\alpha_1$     |                 | ORF1ab | 18060            | U>C               |                   | 0           | 95.1%             | 849            | China, Asia               |
|                | $\alpha_{1a}$   | N      | 28657            | C>U               |                   | 63          | 1.3%              | 2              | France, Europe            |
|                | $\alpha_{1b}$   | ORF1ab | 9477             | U>A               | F>Y               | 63          | 1.2%              | 8              | France, Europe            |
|                | $\alpha_{1c}$   | N      | 28863            | C>U               | S>L               | 63          | 1.2%              | 0              | France, Europe            |
|                | $\alpha_{1d}$   | ORF3a  | 25979            | G>U               | G>V               | 63          | 1.2%              | 344            | France, Europe            |
| $\alpha_2$     |                 | ORF1ab | 8782             | U>C               |                   | 0           | 91.0%             | 47             | China, Asia               |
| $\alpha_3$     |                 | ORF8   | 28144            | C>U               | S>L               | 0           | 90.8%             | 1116           | China, Asia               |
|                | $\alpha_{3a}$   | ORF1ab | 1606             | U>C               |                   | 43          | 1.7%              | 501            | United Kingdom, Europe    |
|                | $\alpha_{3b}$   | ORF1ab | 11083            | G>U               | L>F               | 24          | 9.2%              | 377            | China, Asia               |
|                | $\alpha_{3c}$   | N      | 28311            | C>U               | P>L               | 64          | 1.9%              | 3              | South Korea, Asia         |
|                | $\alpha_{3d}$   | ORF1ab | 13730            | C>U               | A>V               | 71          | 1.8%              | 3              | Taiwan/Malaysia, Asia     |
|                | $\alpha_{3e}$   | ORF1ab | 6312             | C>A               | T>K               | 71          | 1.7%              | 483            | Taiwan/Malaysia, Asia     |
|                | $\alpha_{3f}$   | ORF3a  | 26144            | G>U               | G>V               | 28          | 5.1%              | 452            | China, Asia               |
|                | $\alpha_{3g}$   | ORF1ab | 14805            | C>U               |                   | 54          | 6.0%              | 3              | United Kingdom, Europe    |
|                | $\alpha_{3h}$   | ORF1ab | 17247            | U>C               |                   | 64          | 2.0%              | 580            | Switzerland, Europe       |
|                | $\alpha_{3i}$   | ORF1ab | 2558             | C>U               | P>S               | 54          | 1.7%              | 26             | United Kingdom, Europe    |
|                | $\alpha_{3j}$   | ORF1ab | 2480             | A>G               | I>V               | 54          | 1.6%              | 462            | United Kingdom, Europe    |
| $\beta_1$      |                 | ORF1ab | 3037             | C>U               |                   | 31          | 77.0%             | 40             | China, Asia               |
| $\beta_2$      |                 | S      | 23403            | A>G               | D>G               | 31          | 77.1%             | 9              | China, Asia               |
| $\beta_3$      |                 | ORF1ab | 14408            | C>U               | P>L               | 41          | 76.9%             | 3032           | Saudi Arabia, Middle East |
|                | $\beta_{3a}$    | ORF1ab | 20268            | A>G               |                   | 64          | 5.7%              | 1213           | Italy, Europe             |
|                | $\beta_{3b}$    | N      | 28854            | C>U               | S>L               | 29          | 3.1%              | 34             | China, Asia               |
|                | $\beta_{3c}$    | ORF1ab | 15324            | C>U               |                   | 29          | 2.3%              | 669            | China, Asia               |
|                | $\beta_{3d}$    | ORF3a  | 25429            | G>U               | V>L               | 77          | 1.7%              | 484            | United Kingdom, Europe    |
|                | $\beta_{3e}$    | N      | 28836            | C>U               | S>L               | 74          | 1.6%              | 3              | Switzerland, Europe       |
|                | $\beta_{3f}$    | ORF1ab | 13862            | C>U               | T>I               | 74          | 1.6%              | 50             | Switzerland, Europe       |
|                | $\beta_{3g}$    | ORF1ab | 10798            | C>A               | D>E               | 86          | 1.4%              | 414            | United Kingdom, Europe    |
| $\gamma_1$     |                 | ORF3a  | 25563            | G>U               | Q>H               | 41          | 29.8%             | 884            | Saudi Arabia, Middle East |
|                | $\gamma_{1a}$   | ORF1ab | 18877            | C>U               |                   | 41          | 4.0%              | 757            | Saudi Arabia, Middle East |
|                | $\gamma_{1b}$   | M      | 26735            | C>U               |                   | 41          | 1.5%              | 439            | Saudi Arabia, Middle East |
| $\delta_1$     |                 | ORF1ab | 1059             | C>U               | T>I               | 54          | 23.0%             | 5157           | Singapore, Asia           |
|                | $\delta_{1a}$   | S      | 24368            | G>U               | D>Y               | 72          | 1.3%              | 389            | Singapore, Asia           |
|                | $\delta_{1b}$   | ORF8   | 27964            | C>U               | S>L               | 76          | 2.7%              | 790            | USA, North America        |
|                | $\delta_{1c}$   | ORF1ab | 11916            | C>U               | S>L               | 72          | 1.6%              | 166            | USA, North America        |
|                | $\delta_{1d}$   | ORF1ab | 18998            | C>U               | A>V               | 72          | 1.0%              | 305            | USA, North America        |
| $\epsilon_1$   |                 | N      | 28881            | G>A               | R>K               | 54          | 25.7%             | 2              | United Kingdom, Europe    |
| $\epsilon_2$   |                 | N      | 28882            | G>A               | R>K               | 54          | 25.7%             | 2              | United Kingdom, Europe    |
| $\epsilon_3$   |                 | N      | 28883            | G>C               | G>R               | 54          | 25.7%             | 5365           | United Kingdom, Europe    |
|                | $\epsilon_{3a}$ | ORF1ab | 313              | C>U               |                   | 66          | 2.1%              | 608            | USA, North America        |
|                | $\epsilon_{3b}$ | ORF1ab | 19839            | U>C               |                   | 64          | 1.5%              | 452            | Switzerland, Europe       |
|                | $\epsilon_{3c}$ | M      | 27046            | C>U               | T>M               | 69          | 1.6%              | 453            | Worldwide                 |
|                | $\epsilon_{3d}$ | ORF1ab | 10097            | G>A               | G>S               | 69          | 2.5%              | 5              | Denmark, Europe           |
|                | $\epsilon_{3e}$ | S      | 23731            | C>U               |                   | 69          | 2.5%              | 403            | Denmark, Europe           |
|                | $\epsilon_{3f}$ | N      | 28580            | G>U               | D>Y               | 69          | 1.2%              | 353            | Chile, South America      |
| $\nu_1$        |                 | ORF1ab | 17858            | A>G               | Y>C               | 59          | 4.7%              | 32             | USA, North America        |
| $\nu_2$        |                 | ORF1ab | 17747            | C>U               | P>L               | 59          | 4.7%              | 1374           | USA, North America        |

535

536 **Note.**- Genomic locations correspond to those of the NCBI genome (GenBank ID: NC\_04551.2). Amino  
537 acid changes are shown for non-synonymous variants. Genomes mapped are for nodes in figure 2a.

538
